# Supplementary material for: Perceptions of Painful Diabetic Peripheral Neuropathy in South-East Asia: Results from Patient and Physician Surveys
Source: Springer Nature journal article supplement (doi:10.1007/s12325-017-0536-5), 2017-05-13
Supplement: MOESM1 [file 12286288]

## Supplementary Figure 1.

### Comparison between countries of the specialties involved in the diagnosis and management of pDPN.

A

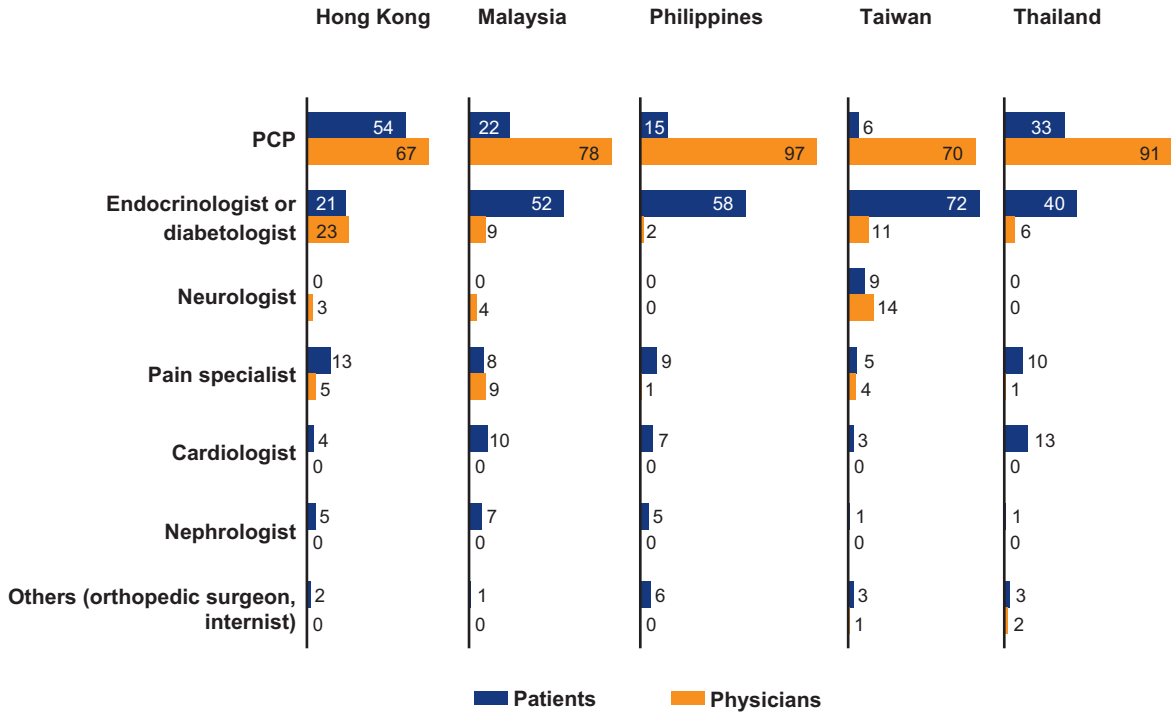

B

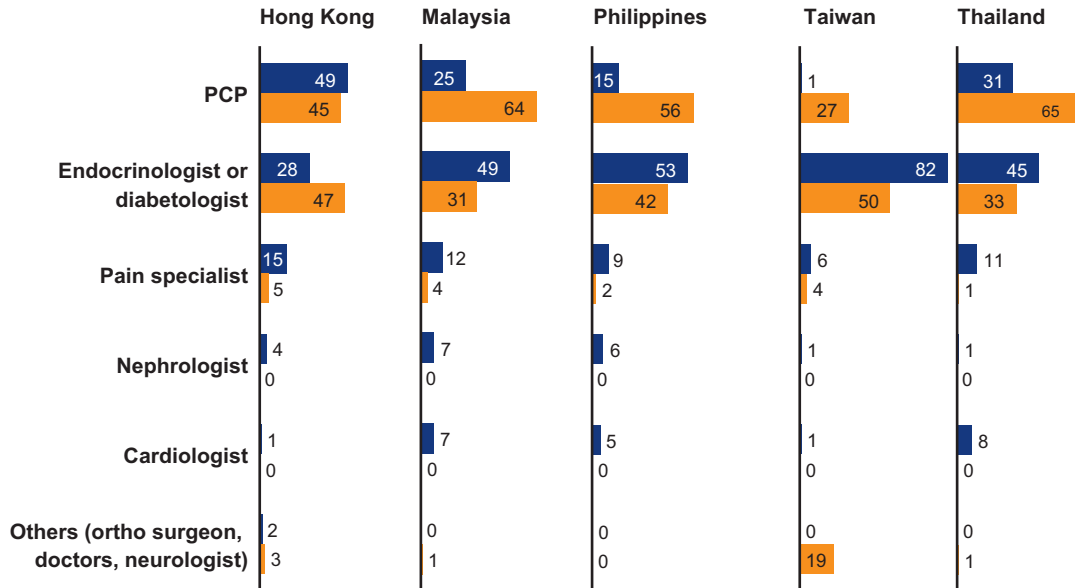

PCP primary care physician, pDPN painful diabetic peripheral neuropathy

Data show the proportion of patients and physicians who reported on the specialty that (A) diagnosed and (B) managed the patients' pDPN.

## Supplementary Figure 2.

Comparison between countries of physicians' awareness and use of diabetes guidelines and sections specifically referring to the management of pDPN.

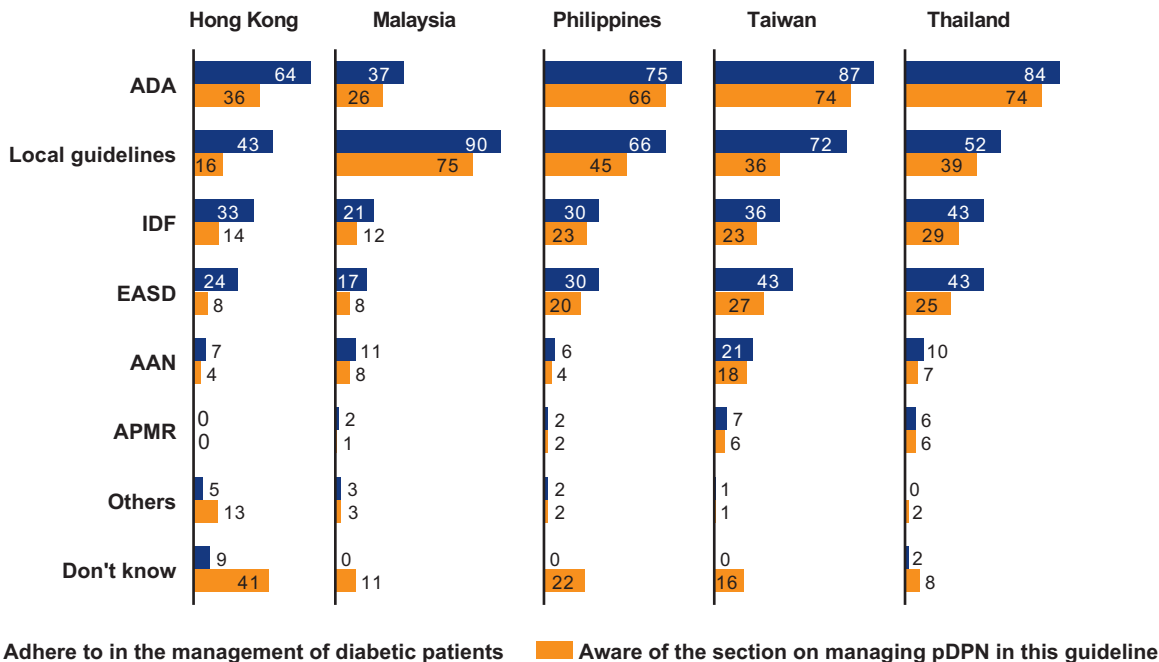

AAN American Academy of Neurology, ADA American Diabetes Association, APMR Archives of Physical Medicine and Rehabilitation, EASD European Association for the Study of Diabetes, IDF International Diabetes Federation, pDPN painful diabetic peripheral neuropathy

Data show the proportion of physicians who adhered to each set of guidelines in the management of diabetic patients, and who were aware of the section in each set of guidelines specifically relating to the management of pDPN.
