# Supplementary material for: Perceptions of Painful Diabetic Peripheral Neuropathy in South-East Asia: Results from Patient and Physician Surveys
Source: Springer Nature journal article supplement (doi:10.1007/s12325-017-0536-5), 2017-05-13
Supplement: MOESM3 [file 12286288]

Article title: **Patient and physician perceptions of painful diabetic peripheral neuropathy in South-East Asia**

Journal name: Advances in Therapy

Author names: **Rayaz A. Malik, Emre Aldinc, Siew-Pheng Chan, Chaicharn**

**Deerochanawong, Chii-Min Hwu, Raymond L. Rosales, Chun-Yip Yeung, Koichi Fujii, and Bruce Parsons**

Email of corresponding author: [emre.aldinc@pfizer.com](mailto:emre.aldinc@pfizer.com)

Affiliation of corresponding author: **Pfizer Inc, New York, NY, USA**

## **PHYSICIAN QUESTIONNAIRE**

### **INTRODUCTION ONLINE**

Thank you for agreeing to participate in this study. This interview is being conducted by Kantar Health, an independent market research agency to investigate doctors' attitudes towards treatment of diabetes in Asia.

The interview will last approximately 20 minutes. Your responses will be kept strictly confidential and your contact information will not be included in any market research report. Your opinions are important to us and would be very much appreciated. Please note that this interview is being carried out strictly for market research purposes and is in no way intended as a promotional exercise for any third party.

Kantar Health is abided by the Market Research Society guidelines and relevant data protection regulations. In line with these, you should be aware that:

- This Market Research is sponsored by a pharmaceutical company, this research study is not designed to be promotional in anyway, you have the right to withdraw from the interview at any time and withhold any information.
- All information shared with you in this interview should be kept confidential and should be assumed to represent hypotheses about what can or cannot be said about a product. It should not be used to influence any thinking or decisions taken outside this research setting.
- Please note that should you raise during this survey an adverse event in a specific patient of a specific drug, you will be obligated to report the adverse event directly to the Company's pharmaco-vigilance team or regulatory authorities.

This survey is being conducted on behalf of a pharmaceutical company.

Please click on the button below to continue

This survey may contain confidential information. Any information obtained through completing this market research is confidential and must not be disclosed to third parties. Do you agree to keep this information confidential?

|     |   |           |
|-----|---|-----------|
| Yes | 1 | Continue  |
| No  | 2 | TERMINATE |

**SECTION 1: PATIENT LOAD AND DIABETES MANAGEMENT PRIORITY**

**Q1.** In a typical month, how many patients, of any condition, do you personally treat?

Patients of any condition in a typical month

**Q2.** Of the *[pipe in answer from Q1]* patients you personally treat in a typical month, how many do you treat with the following conditions...?

| Conditions                                              |       | Number of patients treated in a typical month                  |
|---------------------------------------------------------|-------|----------------------------------------------------------------|
| Diabetes (Type 1 and / or 2)                            | 1     | <input type="text"/> <input type="text"/> <input type="text"/> |
| Any other condition (all other non-diabetes conditions) | 2     | <input type="text"/> <input type="text"/> <input type="text"/> |
|                                                         | TOTAL | =Q1                                                            |

**Q3.** Of those *[pipe in response from Q2 = code 1]* diabetes patients that you treat in a typical month, what proportion suffers from the following conditions?

|                                               |       | Percentage (%) of patients                                       |
|-----------------------------------------------|-------|------------------------------------------------------------------|
| Chronic heart disease                         | 1     | <input type="text"/> <input type="text"/> <input type="text"/> % |
| Obesity                                       | 2     | <input type="text"/> <input type="text"/> <input type="text"/> % |
| Hypertension                                  | 3     | <input type="text"/> <input type="text"/> <input type="text"/> % |
| Arthritis                                     | 4     | <input type="text"/> <input type="text"/> <input type="text"/> % |
| Painful diabetic peripheral neuropathy (pDPN) | 5     | <input type="text"/> <input type="text"/> <input type="text"/> % |
| Kidney disease                                | 6     | <input type="text"/> <input type="text"/> <input type="text"/> % |
|                                               | TOTAL | ≥ 100%                                                           |

**Q4.** What are your priorities when managing your diabetes patients? On a scale of 1–7, what priority would you put on the following when managing your diabetes patients (1 = lowest priority, 7= highest priority)?

|                          |   | Rating 1-7               |
|--------------------------|---|--------------------------|
| Control of HbA1c         | 1 | <input type="checkbox"/> |
| Relief of pain from DPN  | 2 | <input type="checkbox"/> |
| Manage lipid disorder    | 3 | <input type="checkbox"/> |
| Maintain kidney function | 4 | <input type="checkbox"/> |

**Q5.** Based on your perception of the wider *[pipe in country]* market, approximately what proportion of diabetes patients suffer from painful DPN? *[WHOLE NUMBER ONLY (allow from 1 to 100)]*

%

**SECTION 2: IMPACT OF pDPN**

**Q6.** What is the impact of Painful DPN on patient’s quality of life?

|                          |                          |                          |                          |                          |                          |                          |                          |                          |
|--------------------------|--------------------------|--------------------------|--------------------------|--------------------------|--------------------------|--------------------------|--------------------------|--------------------------|
| ←Negligible              |                          |                          |                          |                          |                          |                          | Very Serious→            |                          |
| 1                        | 2                        | 3                        | 4                        | 5                        | 6                        | 7                        |                          |                          |
| <input type="checkbox"/> |

**Q7.** Among your patients with painful DPN, approximately what proportion are impacted by the following as a result of their painful DPN? *[WHOLE NUMBER ONLY (allow from 0 to 100)]*

|                                                    |    |                                                                              |
|----------------------------------------------------|----|------------------------------------------------------------------------------|
| Sleep problems                                     | 1  | <input type="checkbox"/> <input type="checkbox"/> <input type="checkbox"/> % |
| Reduced ability to carry out normal duties at work | 2  | <input type="checkbox"/> <input type="checkbox"/> <input type="checkbox"/> % |
| Reduced ability to perform exercise                | 3  | <input type="checkbox"/> <input type="checkbox"/> <input type="checkbox"/> % |
| Depression                                         | 4  | <input type="checkbox"/> <input type="checkbox"/> <input type="checkbox"/> % |
| Anxiety                                            | 5  | <input type="checkbox"/> <input type="checkbox"/> <input type="checkbox"/> % |
| Poor appetite                                      | 6  | <input type="checkbox"/> <input type="checkbox"/> <input type="checkbox"/> % |
| Reduced libido                                     | 7  | <input type="checkbox"/> <input type="checkbox"/> <input type="checkbox"/> % |
| Increased cases of anger (i.e. due to frustration) | 8  | <input type="checkbox"/> <input type="checkbox"/> <input type="checkbox"/> % |
| Decreased desire to interact with others           | 9  | <input type="checkbox"/> <input type="checkbox"/> <input type="checkbox"/> % |
| Increased difficulty in holding concentration      | 10 | <input type="checkbox"/> <input type="checkbox"/> <input type="checkbox"/> % |

**SECTION 3: DIABETIC PATIENT ENGAGEMENT AND DISCUSSION ON PAIN**

**Q8.** When discussing pain with your diabetes patients what proportion of the time do you initiate the conversation? How about the patient? *[WHOLE NUMBER ONLY (allow from 0 to 100)]*

|                 |       |                                                                  |
|-----------------|-------|------------------------------------------------------------------|
| You, the doctor | 1     | <input type="text"/> <input type="text"/> <input type="text"/> % |
| The patient     | 2     | <input type="text"/> <input type="text"/> <input type="text"/> % |
|                 | TOTAL | 100% %                                                           |

**Q9.** Considering all the diabetes patients you see in a typical month, what proportion do you screen for painful DPN? *[WHOLE NUMBER ONLY (allow from 0 to 100)]*

%

**Q10.** Do you discuss pain with your painful DPN patients every time they visit you? *[SINGLE RESPONSE ONLY]*

|     |   |
|-----|---|
| Yes | 1 |
| No  | 2 |

**Q11a.** When discussing painful DPN with your diabetic patients, how do these patients typically describe the painful DPN they experience? Please review the following list. Please indicate which of the following words or terms patients use to describe their pain. *[MULTIPLE RESPONSES POSSIBLE]*

**Q11b.** *[Ask only if code 99 is not selected for Q11a]* Please review the following list and indicate the order in terms of most commonly used words or terms patients have typically used to describe their painful DPN. Rank the order (max 3) of most commonly described pain symptoms: rank 1 for most common, rank 2 for second most common, and rank 3 for third most common.

|                                           |    | Q11a<br>Please indicate which of the following words or terms patients use to describe their pain | Q11b<br>Rank<br>(Top 3 only) |
|-------------------------------------------|----|---------------------------------------------------------------------------------------------------|------------------------------|
| Burning sensation                         | 1  | <input type="checkbox"/>                                                                          | <input type="checkbox"/>     |
| Numbing sensation                         | 2  | <input type="checkbox"/>                                                                          | <input type="checkbox"/>     |
| Electric shocks                           | 3  | <input type="checkbox"/>                                                                          | <input type="checkbox"/>     |
| Tingling pain                             | 4  | <input type="checkbox"/>                                                                          | <input type="checkbox"/>     |
| Sharp or stabbing                         | 5  | <input type="checkbox"/>                                                                          | <input type="checkbox"/>     |
| Pins & needles                            | 6  | <input type="checkbox"/>                                                                          | <input type="checkbox"/>     |
| Dull ache                                 | 7  | <input type="checkbox"/>                                                                          | <input type="checkbox"/>     |
| Throbbing pain                            | 8  | <input type="checkbox"/>                                                                          | <input type="checkbox"/>     |
| Other, please specify <i>[open ended]</i> |    | <input type="checkbox"/>                                                                          | <input type="checkbox"/>     |
| None of these <i>[single response]</i>    | 99 | <input type="checkbox"/>                                                                          | <input type="checkbox"/>     |

**Q12a.** How easy do you feel your patients find it to clearly describe their pain, without you prompting with terms or words?

| ←Very hard to describe   |                          |                          | Very easy to describe→   |                          |                          |                          |
|--------------------------|--------------------------|--------------------------|--------------------------|--------------------------|--------------------------|--------------------------|
| 1                        | 2                        | 3                        | 4                        | 5                        | 6                        | 7                        |
| <input type="checkbox"/> |

**Q12b.** How easy do you find it to interpret your patients' descriptions of their pain?



| ←Very hard to interpret  |                          |                          | Very easy to interpret→  |                          |                          |                          |
|--------------------------|--------------------------|--------------------------|--------------------------|--------------------------|--------------------------|--------------------------|
| 1                        | 2                        | 3                        | 4                        | 5                        | 6                        | 7                        |
| <input type="checkbox"/> |

**SECTION 4: pDPN DIAGNOSIS, CLASSIFICATION, AND DISEASE MONITORING**

**Q13.** Which of the following tools if provided would you find helpful to diagnose DPN?

*[MULTIPLE RESPONSES ALLOWED]*

|                                               |   |
|-----------------------------------------------|---|
| List of local language descriptions           | 1 |
| Pain scale                                    | 2 |
| Pain questionnaire                            | 3 |
| Others, please specify<br><i>[open ended]</i> |   |

**Q14.** For the diabetic patients that you see that do suffer from painful DPN, where do these patient mostly tell you their pain is coming from? Please indicate the site (or sites) of diabetes-related pain as voiced by your diabetic patients. *[MULTIPLE RESPONSES POSSIBLE]*

|                                                            |   |
|------------------------------------------------------------|---|
| Feet                                                       | 1 |
| Legs                                                       | 2 |
| Arm                                                        | 3 |
| Hands                                                      | 4 |
| Fingers and / or toes                                      | 5 |
| Others, please specify<br><i>[open ended]</i>              |   |
| Do not identify source of pain<br><i>[single response]</i> | 9 |

**Q15.** How long after the patient is diagnosed with diabetes do they develop painful DPN?

*[SINGLE RESPONSE ONLY]*

|                      |   |
|----------------------|---|
| Less than 1 year     | 1 |
| Between 1 to 3 years | 2 |
| More than 3 years    | 3 |

**Q16a.** Of your patients that suffer from painful DPN that you see, what proportion fall into the following classification in terms of pain severity?

|                                                                                 |     | Percentage of patients (%)                                       |
|---------------------------------------------------------------------------------|-----|------------------------------------------------------------------|
| 1 to 3 – mild pain (nagging, annoying, interfering with their daily activities) | 1   | <input type="text"/> <input type="text"/> <input type="text"/> % |
| 4 to 6 – moderate pain (interferes significantly with their daily activities)   | 2   | <input type="text"/> <input type="text"/> <input type="text"/> % |
| 7 to 10 – severe pain (disabling, unable to perform their daily activities)     | 3   | <input type="text"/> <input type="text"/> <input type="text"/> % |
|                                                                                 | SUM | = 100%                                                           |

**Q16b.** In your opinion, how motivated are your diabetic patients in managing their pain condition compared to their existing concomitant conditions? Please rate how motivated you would consider the following patient groups (mild, moderate, severe) are to manage their diabetes related pain.

| ←Not motivated at all    |                          |                          | Extremely motivated→     |                          |                          |                          |
|--------------------------|--------------------------|--------------------------|--------------------------|--------------------------|--------------------------|--------------------------|
| 1                        | 2                        | 3                        | 4                        | 5                        | 6                        | 7                        |
| <input type="checkbox"/> |

**Q17.** Do you consider painful DPN a condition that requires a formal diagnosis? *[SINGLE RESPONSE]*

|     |                           |
|-----|---------------------------|
| Yes | 1<br><i>[Go to Q18]</i>   |
| No  | 2<br><i>[Jump to Q21]</i> |

**Q18.** Do you typically diagnose your diabetic patients with painful DPN yourself or is this done by someone else? Who typically diagnoses your diabetic patients for painful DPN?

*[SINGLE RESPONSE]*

|                                                  |   |
|--------------------------------------------------|---|
| I typically perform the diagnosis myself         | 1 |
| Cardiologists                                    | 2 |
| Endocrinologists / diabetologists                | 3 |
| Pain specialists                                 | 4 |
| Nephrologist                                     | 5 |
| Orthopedic surgeons                              | 6 |
| General practitioner / primary care practitioner | 7 |
| Others, please specify <i>[open ended]</i>       | 8 |

**Q19.** *[Ask if Q18 = code 1]* How do you personally diagnose painful DPN? *[MULTIPLE RESPONSES POSSIBLE]*

|                                                  |   |
|--------------------------------------------------|---|
| Clinical examination                             | 1 |
| Symptom observation                              | 2 |
| Nerve conduction test                            | 3 |
| Foot examination                                 | 4 |
| Monofilament test                                | 5 |
| Medical history                                  | 6 |
| Risk factors, please specify <i>[open ended]</i> | 7 |
| Others, please specify <i>[open ended]</i>       |   |

**Q20.** *[Ask if Q18 = code 1]* For how long do you monitor the condition of your patients that suffer from Painful DPN? *[SINGLE RESPONSE]*

|            |   |
|------------|---|
| <1 month   | 1 |
| 1–3 months | 2 |

|                         |   |
|-------------------------|---|
| > 3 months up to 1 year | 3 |
| >1 year up to 2 years   | 4 |
| >2 years                | 5 |

**SECTION 5: TREATMENT, BARRIERS, AND THE USE OF PAIN GUIDELINES**

**Q21a.** In your opinion, what are the key barriers to treatment when managing painful DPN patients? Please review the following list and indicate whether each are key barriers to treatment when managing diabetes-related pain. Please answer only for your total diabetes-related pain patients. *[MULTIPLE RESPONSES POSSIBLE]*

**Q21b.** Please review the same list and indicate the order of most common barriers. Rank the order (max 3) of most common barrier. Rank 1 for most common, rank 2 for second most common, and rank 3 for third most common.

|                                                            | Q21a<br>Please indicate<br>which of the<br>following are<br>key barriers to<br>treatment | Q21b<br>Rank<br>(Top 3 only) |
|------------------------------------------------------------|------------------------------------------------------------------------------------------|------------------------------|
| Patients do not initiate a discussion on their painful DPN | 1                                                                                        | <input type="checkbox"/>     |
| Patients do not like to discuss their painful DPN          | 2                                                                                        | <input type="checkbox"/>     |
| Patients are fearful of additional costs of treatment      | 3                                                                                        | <input type="checkbox"/>     |
| Patients lack awareness of diabetes specific related pain  | 4                                                                                        | <input type="checkbox"/>     |
| Patients find it difficult to describe their pain          | 5                                                                                        | <input type="checkbox"/>     |
| Patients refuse to accept the seriousness of painful DPN   | 6                                                                                        | <input type="checkbox"/>     |
| Painful DPN is viewed to be unimportant to manage          | 7                                                                                        | <input type="checkbox"/>     |
| Limited consultation time                                  | 8                                                                                        | <input type="checkbox"/>     |
| Others, please specify <i>[open ended]</i>                 |                                                                                          | <input type="checkbox"/>     |

**Q22.** For those diabetic patients that are diagnosed with painful DPN, who typically manages it? *[SINGLE RESPONSE]*

|                                                     |   |
|-----------------------------------------------------|---|
| Myself                                              | 1 |
| Cardiologists                                       | 2 |
| Endocrinologists /<br>diabetologists                | 3 |
| Pain specialists                                    | 4 |
| Nephrologist                                        | 5 |
| Orthopedic surgeons                                 | 6 |
| General practitioner /<br>primary care practitioner | 7 |
| Others, please specify<br><i>[open ended]</i>       | 8 |

**Q23.** Which of the following (if any) do you typically recommend to patients suffering from mild, moderate and severe DPN? *[MULTIPLE RESPONSES POSSIBLE FOR EACH TYPE OF PATIENTS]*

|                                                                                                            |   | Patient types (by pain severity)                                                         |                                                                                        |                                                                                  |
|------------------------------------------------------------------------------------------------------------|---|------------------------------------------------------------------------------------------|----------------------------------------------------------------------------------------|----------------------------------------------------------------------------------|
|                                                                                                            |   | Mild pain<br>(nagging,<br>annoying,<br>interfering<br>with their<br>daily<br>activities) | Moderate<br>pain<br>(interferes<br>significantly<br>with their<br>daily<br>activities) | Severe pain<br>(disabling,<br>unable to<br>perform their<br>daily<br>activities) |
| Change of lifestyle (diet and exercise change) to ease symptoms of pain                                    | 1 | <input type="checkbox"/>                                                                 | <input type="checkbox"/>                                                               | <input type="checkbox"/>                                                         |
| Prescription medication to ease symptoms of pain                                                           | 2 | <input type="checkbox"/>                                                                 | <input type="checkbox"/>                                                               | <input type="checkbox"/>                                                         |
| Traditional medication (e.g. herbs, Chinese medication) to ease symptoms of pain                           | 3 | <input type="checkbox"/>                                                                 | <input type="checkbox"/>                                                               | <input type="checkbox"/>                                                         |
| Vitamin treatment and health supplements to ease symptoms of pain                                          | 4 | <input type="checkbox"/>                                                                 | <input type="checkbox"/>                                                               | <input type="checkbox"/>                                                         |
| Better regulate existing diabetes treatment (i.e. tightening blood sugar control) to ease symptoms of pain | 5 | <input type="checkbox"/>                                                                 | <input type="checkbox"/>                                                               | <input type="checkbox"/>                                                         |
| Other, please specify <i>[open ended]</i>                                                                  | 6 |                                                                                          |                                                                                        |                                                                                  |

**Q24a.** What diabetes guidelines, if any, do you adhere to in the management of your diabetes patients? *[MULTIPLE RESPONSES POSSIBLE]*

**Q24b.** Are you aware if these guidelines have a section on the management of painful DPN? *[MULTIPLE RESPONSES POSSIBLE]*

|                                                                                                |   | <b>Q24a</b>              | <b>Q24b</b>              |
|------------------------------------------------------------------------------------------------|---|--------------------------|--------------------------|
| American Diabetes Association (ADA)                                                            | 1 | <input type="checkbox"/> | <input type="checkbox"/> |
| International Diabetes Federation (IDF)                                                        | 2 | <input type="checkbox"/> | <input type="checkbox"/> |
| Archives of Physical Medicine and Rehabilitation (APMR)                                        | 3 | <input type="checkbox"/> | <input type="checkbox"/> |
| American Academy of Neurology (AAN)                                                            | 4 | <input type="checkbox"/> | <input type="checkbox"/> |
| European Association for the Study of Diabetes (EASD)                                          | 5 | <input type="checkbox"/> | <input type="checkbox"/> |
| Local Guidelines                                                                               | 6 | <input type="checkbox"/> | <input type="checkbox"/> |
| I am not aware that these guidelines have a section on the management of diabetes related pain | 7 |                          | <input type="checkbox"/> |
| Others, please specify <i>[open ended]</i>                                                     |   | <input type="checkbox"/> | <input type="checkbox"/> |

**THANK YOU AND CLOSE.**
